# Supplementary material for: DNA Polymerase Delta Exhibits Altered Catalytic Properties on Lysine Acetylation
Source: MDPI journal article supplement (doi:10.3390/genes14040774), 2023-03-23
Supplement: s1 [file s1]

### Supplementary Figure S1A

### In Vitro Acetylated Pol $\delta$

73 exclusive unique peptides, 114 exclusive unique spectra, 197 total spectra, 880/1107 amino acids (79% coverage)

9 exclusive unique peptides, 11 exclusive unique spectra, 22 total spectra, 87/107 amino acids (81% coverage)

1 MGRKRLITDS YPVVKRR EGP AGHSKGELAP ELGEEPQPRD EEEAELELLR QFDLAWQYGP CTGITRLQRW CRAKQMGLEP PPEVWQVLKT  
91HPGDPRFQCS LWHLYPL

### Immunoprecipitated Pol $\delta$ from HEK293T Cells

**42 exclusive unique peptides, 50 exclusive unique spectra, 138 total spectra, 634/1107 amino acids (57% coverage)**

|      |             |             |              |             |             |             |             |            |            |
|------|-------------|-------------|--------------|-------------|-------------|-------------|-------------|------------|------------|
| 91   | MDGKKRPPGPG | PGVVPKKRARG | GUGDDDDADPR  | PSQFEEDLAL  | MEEMEAHRL   | QEQEELLESQ  | VLEGVADGGV  | PPSALDPRWL | RPTPPDALDP |
| 97   | TEPLIFFOOLE | IDHYVVGPAQP | VGPPGPPPSRG  | SVPVLRFAVG  | TDEGFSVCCH  | IHGFAFPYFT  | PAPPGFGPEH  | MGDLORELNL | AISRDSPGGR |
| 187  | ELTGPAVLVA  | ELCSRESFMFG | YHGSDGSPSPFL | RITVALPRLV  | APARRLLEQG  | IRVAVGLGTPS | FADPYEGLDF  | EIRFMWDTDF | VGCNWLPLPA |
| 271  | GKYALRLKEK  | ATKQCLEADV  | LHGSDVVSHPP  | EGVPQRITAPL | RVLSPDIECA  | GRKGIPEPE   | RDRVIQICSL  | GLRWGEPEFI | LRALALTLPK |
| 381  | APILGAKVQS  | YEKEEDLLQA  | WSTFIRIMDP   | DVPTGYNIQN  | FDLPYLISRA  | QTLKVQTFPF  | LGRVAGLCSN  | IRDSSFQSKQ | TGRDRTKVVS |
| 451  | MVGRVQMDML  | QVLLREYKLR  | SYTLNNAVSFH  | FLGGEQKEDVQ | HSITLTLQNG  | NDQTRRLAV   | YCLDKDAYLPL | RLLERLMVLV | NAVEMAVRTG |
| 547  | VPLSYLLSLRG | QGVKKVVSQLL | RQAMHEGLLM   | PVVKSEGGED  | VTGATVIIEPL | KGYDVPDIAT  | LDFFSLYPSI  | MLAHNLCTYT | LLRPGTAQKL |
| 621  | GLTDEQFIRI  | PTGDEFEVKT  | VRKGLLPQIL   | ENLLSARKRA  | KAELEAKETDP | LRRQVLDGRQ  | LALKVNSAVS  | YGFTGAQGVK | LPCLIEISQV |
| 737  | TGFGRRQMIK  | TQOLVESKYTS | VENGYSSTSAK  | VYVGDTDSVQ  | CRFGVSSVAE  | AMALGREAAD  | VWSGFFSPSI  | RLFEFGVYFP | YLLISKKRYA |
| 811  | GLLFSSRPDR  | HDRMDCKGLGE | AVRRDNCPLV   | ANLVTASLRR  | LLIDRDPEGA  | VAHAQDVISD  | LLCNRIDISQ  | LVITKELTRA | ASDYAGKQAH |
| 901  | VELAERMRKA  | DGGSAPSLGD  | RVPVYVISA    | KGVAAVMKSE  | PLDFVLVLESH | PIDTQYYLEK  | QLAKPLRLIF  | EPILGEGRAE | AVLLRGDHTR |
| 991  | CKTVLTGKVG  | GLLFAFAKRRN | CCIGCRPTVLS  | HQGAIVEFCFO | PRESELYQKE  | VSHNLALEER  | FSRLWTQCQR  | CQGSLEDHVI | CTSRDPCIFY |
| 1081 | MRKKVRKDL   | DEQELLRRRG  | PPGPEAW      |             |             |             |             |            |            |

10 exclusive unique peptides, 13 exclusive unique spectra, 24 total spectra, 87/107 amino acids (81% coverage)

1 MGRKRLITDS YPVVKRR EGP AGHSK GELAP ELGEEPQPRD EEEAELELLR QFDLAWQYGP CTGITRLQRW CRAK QMGLEP PPEVWQVLKT  
91 HPGDPR FQCS LWHLYPL

Peptide sequences detected by mass spectrometric analysis are highlighted in yellow. Lysine residues detected have a +42 dalton change were identified as acetylated residues and have been highlighted in green. Oxidized methionine residues served as dynamic modification controls (also highlighted in green). Supplementary Figure 1A displays the sequence obtained from *in vitro* acetylated Pol d and Figure 1B displays the sequence obtained from endogenous polymerase that was immunoprecipitated from HEK293T cells. Coverage obtained is also indicated above the sequence.

## Supplementary Figure S2

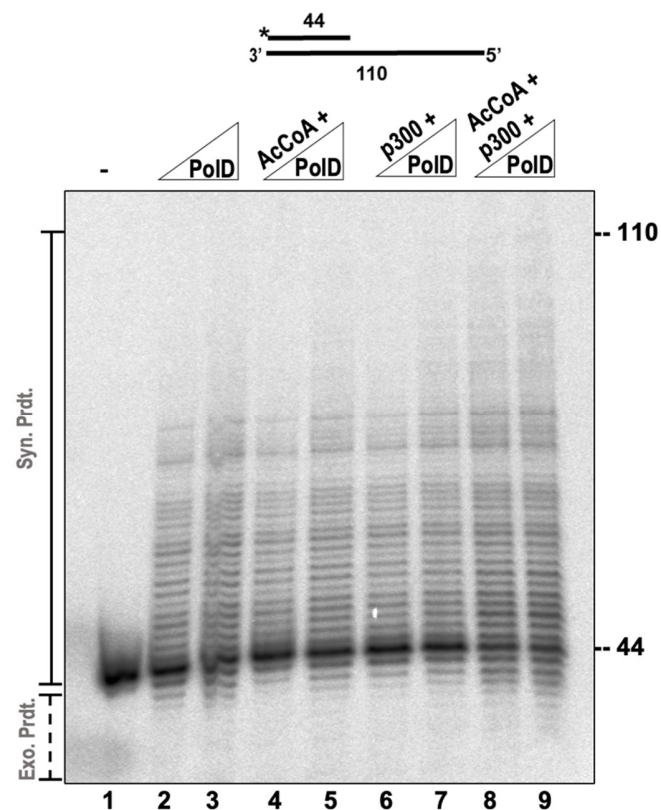

### Supplementary Figure S2: Synthesis Activity of Pol Delta

The synthesis activity of pol  $\delta$  was assayed using the 5nM substrate (U1:T1) in the presence of varying concentration (20, 50 nM) of either pol  $\delta$ , pol  $\delta$  + AcCoA, pol  $\delta$  + p300 (HAT domain) and acetylated pol  $\delta$  (pol  $\delta$ +AcCoA+p300) as described in Materials and Methods. The substrate is depicted above the gel image and the asterisk denotes the location of the radiolabel. Exonuclease products (Exo.Prdt.), and synthesis products (Syn. Prdt.) are indicated adjacent to the gel image. Nucleotide sizes are also indicated.
